# Supplementary material
Source: PubMed Central journal article supplement (PMC3631324)
Supplement: supp_mct034_mct034supp.pdf [file supp_mct034_mct034supp.pdf]

SUPPLEMENTARY DATA

FIG. S1. Alignment of SsGAMYB amino acids and the homologous genes in *A. thaliana*, *O. sativa* and *H. vulgare*. The asterisks mark the R2R3 domain and BOX 1, 2 and 3 of SsGAMYB.

|          |       |                                                                          |                  |
|----------|-------|--------------------------------------------------------------------------|------------------|
|          |       |                                                                          | *****            |
| SsGAMYB  | (1)   | MTSESE—EWMIS—KNGIDSPSDVSSGG—NVGANGPLKKGWPTS AEDAILVDYVVKHGE GNWNA        |                  |
| AtMYB33  | (1)   | MSYTTSDSD—HNESPAADDNGSDCRS—RWDGHALKKGWSSAEDDILIDYVVKHGE GNWNA            |                  |
| AtMYB65  | (1)   | MSYTTATADSDGMHSSIHNE SPAPDSISNGCRS—RGRSVLKKGPWTS TEDGILIDYVVKHGE GNWNA   |                  |
| AtMYB101 | (1)   | MDGGGETTATATMEGRGLKKGWPTTDEDAILTEYVVKHGE GNWNA                           |                  |
| OsGAMYB  | (1)   | MYRVKSESDCEMIHQE—QMDSPVADDGSSGG—SPHRGGG—PPLKKGWPTS AEDAILVDYVVKHGE GNWNA |                  |
| HvGAMYB  | (1)   | MYRVKSESDCEMHQED—QMDSPVGGDGGSSGGSPHRGGG—PPLKKGWPTS AEDAILVDYVVKHGE GNWNA |                  |
|          |       |                                                                          | ***** R2R3 ***** |
| SsGAMYB  | (61)  | VQKHSGLARCGKSCRLRWANHLRPNLKKGAFSPPEERHITELHAKMGNKWARMAAELPGRTDNEIKNYWN   |                  |
| AtMYB33  | (60)  | VQKHTSLPRCGKSCRLRWANHLRPNLKKGAFSQEEELIVELHAKMGNKWARMAAHLPGRTDNEIKNYWN    |                  |
| AtMYB65  | (69)  | VQKHTSLARCGKSCRLRWANHLRPNLKKGAFSQEEELIVELHAKMGNKWARMAAHLPGRTDNEIKNYWN    |                  |
| AtMYB101 | (46)  | VQKNSGLRRCGKSCRLRWANHLRPNLKKGAFSTPEEKIITLHAKLGNKWARMAAHLPGRTDNEIKNYWN    |                  |
| OsGAMYB  | (68)  | VQKNTGLPRCGKSCRLRWANHLRPNLKKGAFITPEERLITLHAKMGNKWARMAAHLPGRTDNEIKNYWN    |                  |
| HvGAMYB  | (70)  | VQKNTGLPRCGKSCRLRWANHLRPNLKKGAFITPEERLITLHAKMGNKWARMAAHLPGRTDNEIKNYWN    |                  |
|          |       |                                                                          | ***** ** BOX1 ** |
| SsGAMYB  | (131) | TRIKRRQRAGLPITYPPDICTQAFNDNQNEDMAAFSSGDVHHPDFLPINNFEIPAVEFKLELNQQLHPQ    |                  |
| AtMYB33  | (130) | TRIKRRQRAGLPITYPEMHVEALEWSQE—YAKSRVMGEDRR—HQDFLQLGSCESNVFFDTLNFT         |                  |
| AtMYB65  | (139) | TRIKRRQRAGLPITYPEIYVDDLHWSEE—YTKSNIIRVDRRRRHQDFLQLGNSKDNVLFDDLNF         |                  |
| AtMYB101 | (116) | TRIKRRQRAGLPITYPEIQHQGIDIDDE—FEFD—ITS—FQFQNDLQDHNHQM                     |                  |
| OsGAMYB  | (138) | TRIKRQRAGLPITYPTSVCGSSNEDQQ—CSSDFDCGENLS—NDLLNANGLYLPDFTCDNFIAN          |                  |
| HvGAMYB  | (140) | TRIKRQRAGLPITYPASVCGSSNEDQQ—GSSDFRCGENLS—SDLLNGLYLPDFTCDNFIAN            |                  |
| SsGAMYB  | (201) | AFLDIPANSLLDIPASSLLAQLNSSYPNKVLLSTIYPSKFRGSESLFGLSAAVGSTLPDSNQYQSDG      |                  |
| AtMYB33  | (192) | D—MVPGTPDLADMTAYKNMGNCASSPRYENFMPTIIPSSKRLWESELLYPGCSSTIKQEFSSPEQFRNTS   |                  |
| AtMYB65  | (203) | ASLLPAASDLSLVACNMLGTGASSRYSYEMPPILPSPKQIWESGSRFPCCSSNIKHEFQSPHFQNTA      |                  |
| AtMYB101 | (166) | IQYTNSSNTSSSSSSFSSSSQSKRLRPDFLVSTNPLNIPDSSMDFQMFSLYNNLENDNNQFGFSV        |                  |
| OsGAMYB  | (200) | SEALPYAPHLSAVSISNLLGQSFAS—KSCSFMQVNVQTG—MLKQSDGVLPGLSDTINGVLISSVDQFSNDS  |                  |
| HvGAMYB  | (202) | SEALSYAPQLSAVSISNLLGQSFAS—KNCQFMQVNVQAG—MLKQSDPLPGLSDTINGALSSVDQFSNDS    |                  |
| SsGAMYB  | (271) | SVEIFQPSVFSAYDHNSTPDHASS—SVLPGSHAILNGNTSSSEPTTWAMKLELPSLQTHMG—S          |                  |
| AtMYB33  | (261) | PQTISKTCSPVPCDVEHPLYGNRHS—PVMIPDSHTPTDGLVPYSKPLYGAVKLELPSFQYSET—TFDQ     |                  |
| AtMYB65  | (273) | VQKNRSCSIS—POVDVHHPYENQHSMMMPDSHTVYGMHPTSKPLFGAVKLELPSFQYSETSAFDQ        |                  |
| AtMYB101 | (236) | PLS—SSSSNEVCNPNHILEYISEN—SDTRNTKKDIDAMSYSSLVGDLEIRSSSPFLGLDNSVLE         |                  |
| OsGAMYB  | (268) | EK—LKQAVGFDYLHEANSTKIIAPFGGALNGSHAFLNGNFSASRPTSGLKME LPSLQDTE S—DPNS     |                  |
| HvGAMYB  | (270) | EK—LKQALGFDYLHEANSSKIIAPFGGALNGSHAFLNGNFTSRTINGFLKME LPSLQDTE S—DPNS     |                  |
|          |       |                                                                          | ***** ** BOX2 ** |
| SsGAMYB  | (334) | VGSPSSP—LPSLESVDITLQITPPV—EHPHSSNLSSQNSGLLDAVLYESHSMK—NSKNSFQQTSHAS      |                  |
| AtMYB33  | (328) | WKSSSPPH—SDLLDPFDITIQSPPPP—TGEEESDLYSNFDTGLLDMLLLEAKIRNNSTKNNLYRSCASTI   |                  |
| AtMYB65  | (342) | WKTTPSPPH—SDLLDSVDAYIQSPPPP—SQVEESDQFSSCDTGLLDMLLLEAKIKT—SAKHSLLMSSPQKS  |                  |
| AtMYB101 | (301) | LPSNQRPHTSPSSPIIDNGVHLEPP—SGNSGLLDALLDESQLS—RGLPKDVRVSSS                 |                  |
| OsGAMYB  | (334) | WLKYTVAPA—LQPTLVDPYVQSPAA—TPSVKSEPCASPRNSGLLEELLHEAQLR—SGKNQQTSVISSSS    |                  |
| HvGAMYB  | (336) | WLKYTVAPA—MQPTLVDPYVQSPTA—TPSVKSEPCASPRNSGLLEELLHEAQLR—SGKNKQLSVRSSSS    |                  |
| SsGAMYB  | (398) | IMPVDMINTSSQDLHEADWVFAEPI SPLGRSSSSVFSSECTPISGSS—FDELQSVFMPVKEEAADRLVL   |                  |
| AtMYB33  | (397) | PSADLQGVTVSQTKSEFDNSLKS—FLVHSEMS—TQNADE                                  |                  |
| AtMYB65  | (409) | FSSITCTTNTQNVPRGSENLKSGE—YEDSQYLGRSEITSPSQLSAGGFSSAFAGNVVKTTEELDQ        |                  |
| AtMYB101 | (358) | DLCEVQDKRYKDFENLLIDHLNS—SNHSSLGANPNHNKYNPTMVKVTVDDDDLEL                  |                  |
| OsGAMYB  | (401) | SVGTFCNTTVLSPFDMCQYWEEQHPGPF LNDCAPFSGNSPTESTPPVSAASPDIFQLSRVSPAQSTSM    |                  |
| HvGAMYB  | (403) | SVSTPCDITTVSPFDFLCOYWEER—LNEYAPFSGNSLTGSTAPMSAASPDVFLSKISPAQSPSL         |                  |
| SsGAMYB  | (467) | MKYDERAETTQMI FSRPDLFLASN—CFVSMNTHNEHCLLKDATGTPICDDLKDKQMDTA—AASSA       |                  |
| AtMYB33  | (435) | TP—PSELLFTLPSLEIVC—                                                      |                  |
| AtMYB65  | (475) | VWE—PKRVDITRPDVLASSWLDQGCYGI VSDTSSMSDALALLGGDIGNSYVTVGSS—SGQAP          |                  |
| AtMYB101 | (415) | TS—LLNFPSTTTPLPDWYRVTEMQNEASYLAPPSGILMGNHQGNRVEPPTVPPSSSVD               |                  |
| OsGAMYB  | (471) | GSGEQVMGPKYEP—GDTSPHFENFRPDALFSGNTADPSVFNNATAMLGNDLSIDCRPV LGD—GIMFN     |                  |
| HvGAMYB  | (468) | GSGEQAMEPAYEPGAGDTSSHENLRPDAPFSGNTADSSVFNNATAMLGNDMNTCECKPVFGD—GIMFD     |                  |
|          |       |                                                                          | *BOX3*           |
| SsGAMYB  | (534) | QHGPDNCAVNAFPTV—                                                         |                  |
| AtMYB33  | (452) | —                                                                        |                  |
| AtMYB65  | (537) | RGVGSY—GVINMPVWSL—                                                       |                  |
| AtMYB101 | (474) | PMA SLGSCYWSNMPSIC—                                                      |                  |
| OsGAMYB  | (537) | SSS—WSNMPHACEMSEFK—                                                      |                  |
| HvGAMYB  | (536) | TSV—WSNLPHACQMSEEPK—                                                     |                  |

FIG. S2. Alignment of *SsLFY* nucleotide and its homologous genes in *A. thaliana* and *S. lycopersicum*.

|              |       |                                                                         |
|--------------|-------|-------------------------------------------------------------------------|
| <i>SsLFY</i> | (1)   | GAAGTAGCACGTGGCAAAAAGAACGGCCTTAGATTATCTGTTCCATCTGTACGAGCAGTGCCGCGAGTTCT |
| <i>AtLFY</i> | (730) | GAAGTGGCACGTGGCAAAAAGAACGGCTTAGATTATCTGTTCCACTGTACGAACAATGCCGTGAGTTCC   |
| <i>SILFY</i> | (746) | GAAGTAGCACGTGGCAAAAAGAACGGCCTTAGATTATCTGTTCCATCTGTACGAACAATGCCGTGATTTCT |

  

|              |       |                                                                |
|--------------|-------|----------------------------------------------------------------|
| <i>SsLFY</i> | (71)  | TGATCCAAGTTCAGAAATATTGCCAAGGAAGAGGTGAAAAATGCCCTACCAAGGTGACGAA  |
| <i>AtLFY</i> | (860) | TTCITTCAGGTCCAGACAATTGCTAAAGACCGTGGCGAAAAATGCCCTACCAAGGTGACGAA |
| <i>SILFY</i> | (846) | TGATCCAAGTTCAGACTATTGCTAAGGAACGAGGTGAAAAATGCCCTACCAAGGTGACGAA  |

FIG. S3. Relative expression levels of *AP1* and *AP3* in abnormal flower organs of transgenic lines compared to WT using real-time quantitative RT-PCR. Relative expression levels are normalized using  $\beta$ -actin and WT levels are set at 1 using the software of Mastercycler ep realplex (Eppendorf, Hamburg, Germany).

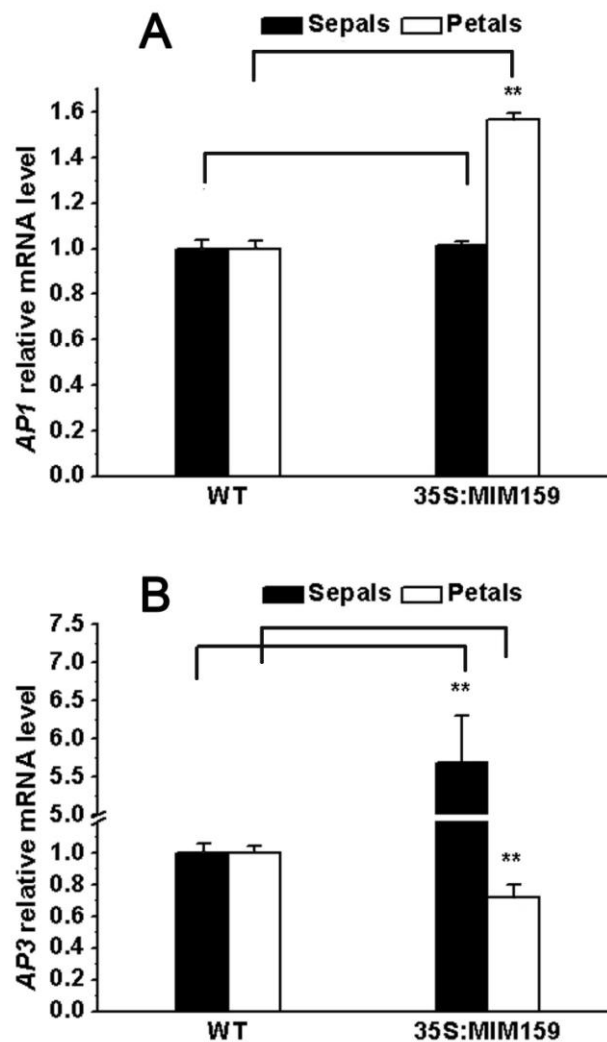

FIG. S4. Expression patterns of *API*, *AP3*, *AG* and *GAMYB* in various tissues of wild type gloxinia by semi-quantitative RT-PCR.

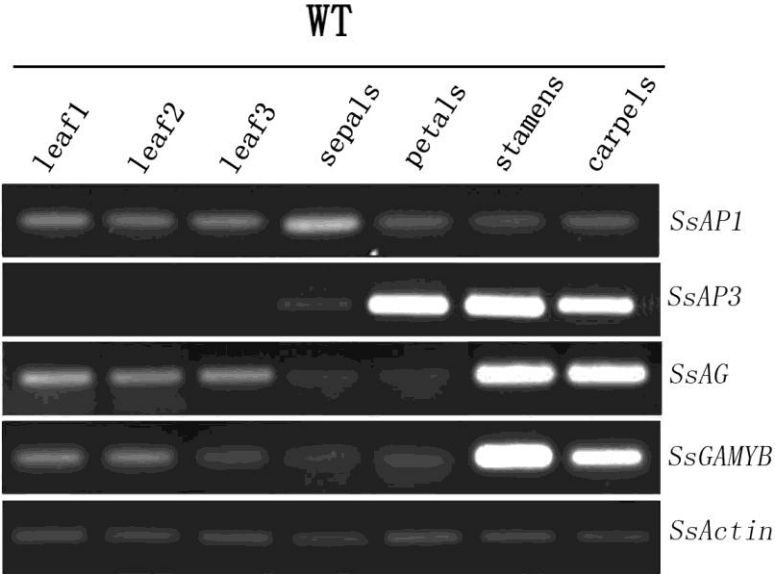

TABLE S1. Primers used in the experiments

|                          | Primers                                               |
|--------------------------|-------------------------------------------------------|
| MIM159-I                 | CTTTTGGATTGAtagGGGAGCTCTATTTCTAGAGGGAGATAA            |
| MIM159-II                | AATAGAGCTCCCCctaTCAATCCAAAAGCTTCGGTTCCCCTCG           |
| miR159a-Stem-loop primer | GTTGGCTCTGGTGCAGGGTCCGAGGTATTTCGCACcagagccaACTAGAGCTC |
| miR159a Forward          | GCGGCGGTTTGGATTGAAG                                   |
| UPM                      | GTGCAGGGTCCGAGGT                                      |
| SsU6-UP                  | GACATCCGATAAAAATTGGAACGATA                            |
| SsU6-DN                  | ATTTTGGACCATTCTCGATTTGT                               |
| SsGAMYB-UP               | GTATGACTAGTGAAAGTGAGGAATGG                            |
| SsGAMYB-DN               | GACAGTAGGCATAGCATTCCAAGCAC                            |
| SsActin-UP               | CAATAAATTGCGTGTTGCTCCTGAG                             |
| SsActin-DN               | TGTTTCCGTACCGATCCTTTCTGATA                            |
| IPS1-UP                  | GGGTACCCAAACACCACAAAACAAAAGA                          |
| IPS1-DN                  | CGGATCCACTATAAAGAGAATCGGAAGCA                         |
| SsLFY-UP                 | GAAGTRGCACGTGGCAAAAAGAACG                             |
| SsLFY-DN                 | TTCGTCACCTTSGTRGGGCATTTTTC                            |
| SsGAMYB-qRT-UP           | CAACACTTCTTCTTCAGAGCCTACT                             |
| SsGAMYB-qRT-DN           | GCCACTGTTTTGAGATGAAAGAT                               |
| SsActin-qRT-UP           | TTCTCCTTTACATCACGAACAATTT                             |
| SsActin-qRT-DN           | ATCCAGGCTGTCTTTTCATTGTAT                              |
| SsLFY-qRT-UP             | GAAGTTGCACGTGGCAAAAAGAACG                             |
| SsLFY-qRT-DN             | TTCGTCACCTTCGTTGGGCATTTTTC                            |
| SsAG1-qRT-UP             | CTGATTGTCTTCTCTAGCAGAGGCCGCC                          |
| SsAG1-qRT-DN             | GCACCCAAAGATTCACCAAGCATGTTCC                          |
| SsAP1-qRT-UP             | TACTCAAGGCTCCGATTGGCAGGCGAC                           |
| SsAP1-qRT-DN             | TCTCGCATGGACAGGATTCTTGAGAGG                           |
| SsAP3-qRT-UP             | GACTTTTGCAGCCCTTCTACGACGTTGG                          |
| SsAP3-qRT-DN             | TCCAAGTGCAGTTGGCGCAGCTTGAAT                           |

TABLE S2. Sequence of MIM159 (the artificial miR159a sequence is in red)

|                                                                                                                                                                                                                                                                                                                                                                                                                                                                                                                                                                                          |
|------------------------------------------------------------------------------------------------------------------------------------------------------------------------------------------------------------------------------------------------------------------------------------------------------------------------------------------------------------------------------------------------------------------------------------------------------------------------------------------------------------------------------------------------------------------------------------------|
| AAACACCACAAAACAAAAGAAAATGGCCATCCCCTAGCTAGGTGAAGAAGAATGA<br>AAACCTCTAATTTATCTAGAGGTTATTCATCTTTTAGGGGATGGCCTAAATACAAAATG<br>AAAACCTCTCTAGTTAAGTGGTTTTGTGTTTCATGTAAGGAAAGCGTTTTAAGATATGGAG<br>CAATGAAGACTGCAGAAGGCTGATTCAGACTGCGAGTTTTGTTTATCTCCCTCTAGAAA<br><b>TAGAGCTCCCCctaTCAATCCAAA</b> AGCTTCGGTTCCCCTCGGAATCAGCAGATTATGTA<br>TCTTTAATTTTGTAATACTCTCTCTTCTCTATGCTTTGTTTTTCTTCATTATGTTTGGG<br>TTGTACCCACTCCCGCGCGTTGTGTGTTCTTTGTGTGAGGAATAAAAAAATATTCGGAT<br>TTGAGAACTAAACTAGAGTAGTTTTATTGATATTCTTGTTTTTCATTTAGTATCTAATA<br>AGTTTGGAGAATAGTCAGACCAGTGCATGTAAATTTGCTTCCGATTCTCTTTATAGTG |
|------------------------------------------------------------------------------------------------------------------------------------------------------------------------------------------------------------------------------------------------------------------------------------------------------------------------------------------------------------------------------------------------------------------------------------------------------------------------------------------------------------------------------------------------------------------------------------------|
